# Supplementary material for: The role of serum inflammatory cytokines and berberine in the insulin signaling pathway among women with polycystic ovary syndrome
Source: PubMed Central journal article supplement (PMC7423132; doi:10.1371/journal.pone.0235404), 2020-08-12

AMPK:

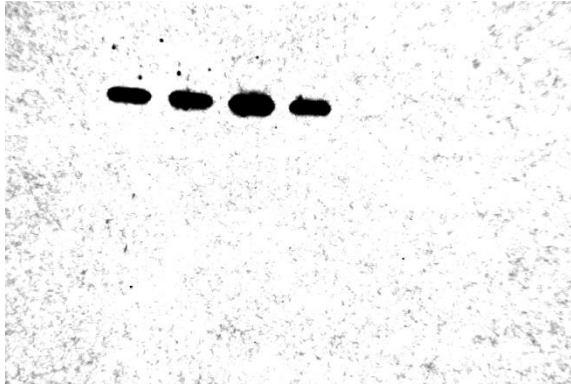

P-AMPK:

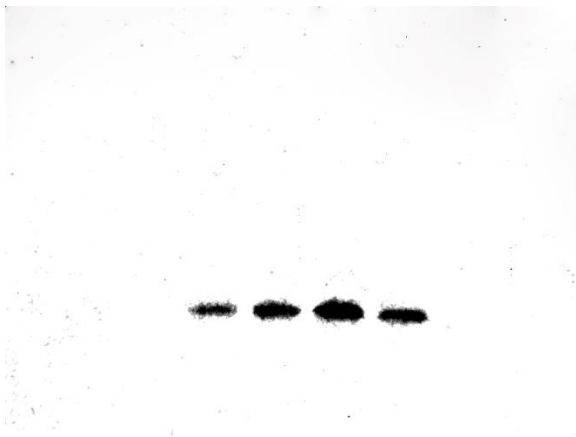

MTOR:

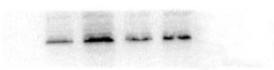

P-MTOR:

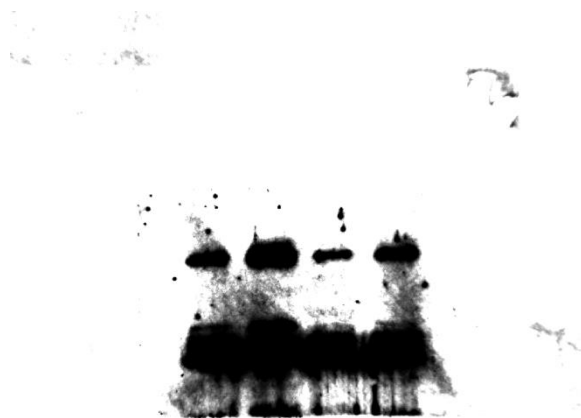

STAT3:

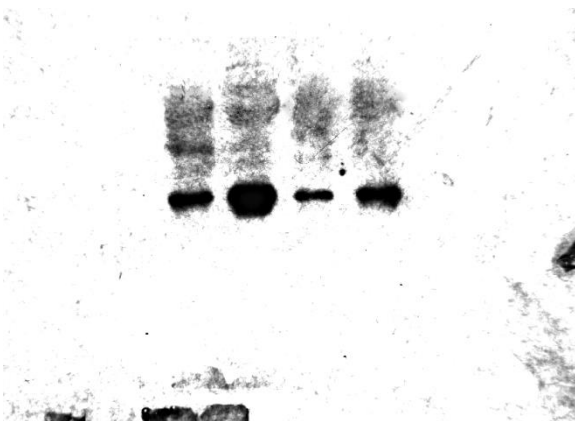

IRS-1:

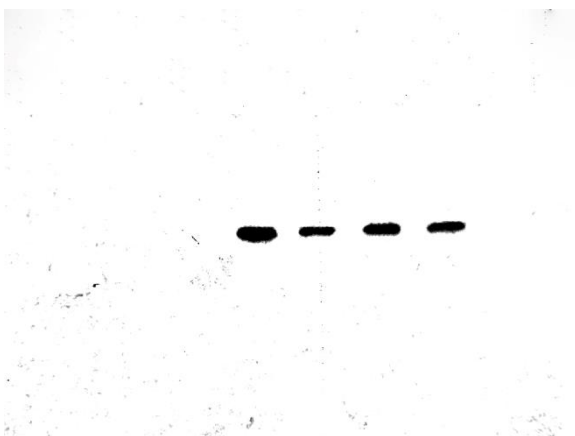

ACTIN $\beta$ :

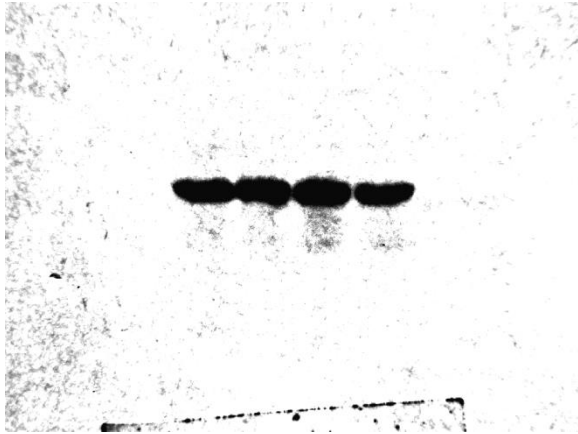

Supplement: pone.0235404.s001.pdf [file pone.0235404.s001.pdf]
